# Supplementary material for: Sphingosine kinase 1 expression enhances colon tumor growth
Source: Springer Nature journal article supplement (doi:10.1186/s12967-017-1220-x), 2017-05-31
Supplement: MOESM1 [file 12339348]

Supplemental table 1. PCR primers for genotyping

|                 | Primer, 5'-3'                  |                                |
|-----------------|--------------------------------|--------------------------------|
|                 | Forward                        | Reverse                        |
| SphK1 wild type | TGTCACCCATGAACCTGCTGTCCCTGCACA | AGAAGGCACTGGCTCCTCCAGAGGAACAAG |
| SphK1 mutant    | TCGTGCTTTACGGTATCGCCGCTCCCGATT |                                |
| tetO-hSphK1 Tg  | CGCAAATGGGCGGTAGGCGTG          | TAGAAGGCACAGTCGAGG             |
| rtTA Tg         | AGGGAAACACCTACTACTGA           | ATTCCAAGGGCATCGGTA             |

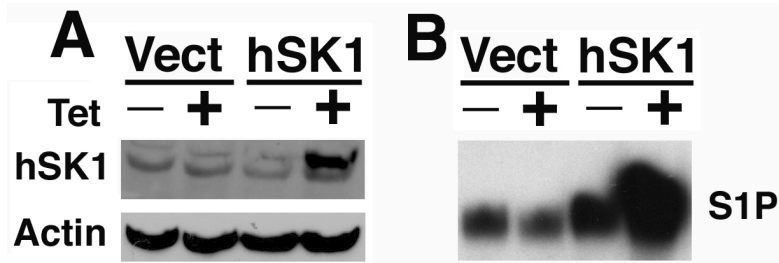

**Supplemental Figure S1 - SphK1 overexpression in MCF-7 cells.**

A) SphK1 protein level is overexpressed in response to tetracycline treatment. B) SphK1 activity is also increased by tetracycline treatment.

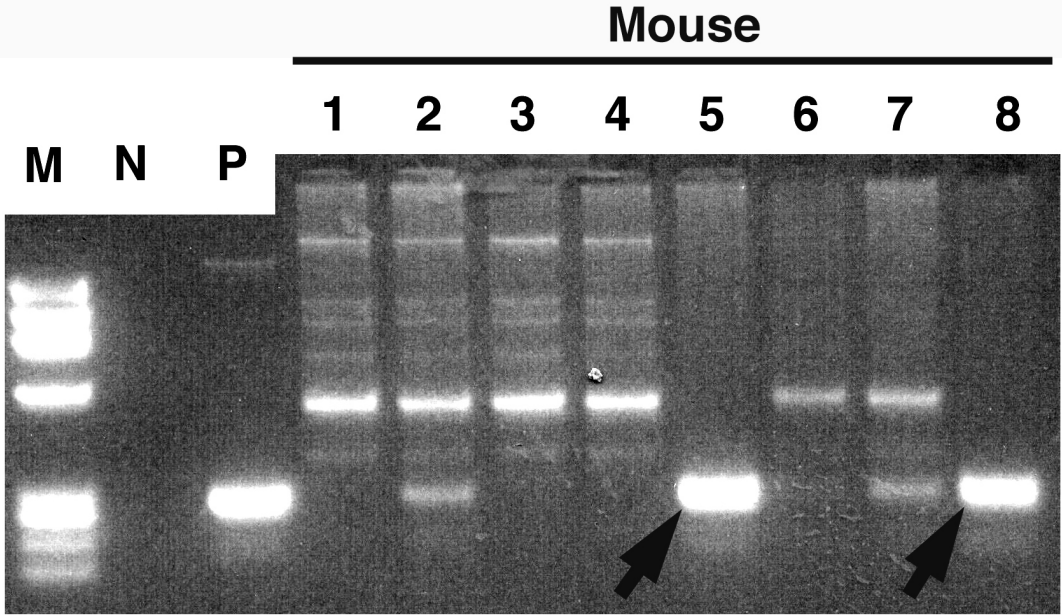

**Supplemental Figure S2 - PCR genotyping of tetO-SphK1 Tg mice founders.** Arrows indicate the founders. M, marker; N, negative control; P, positive control.

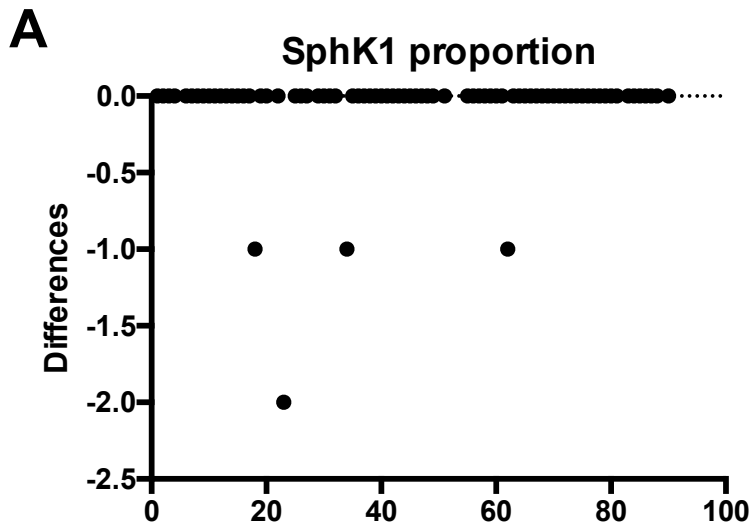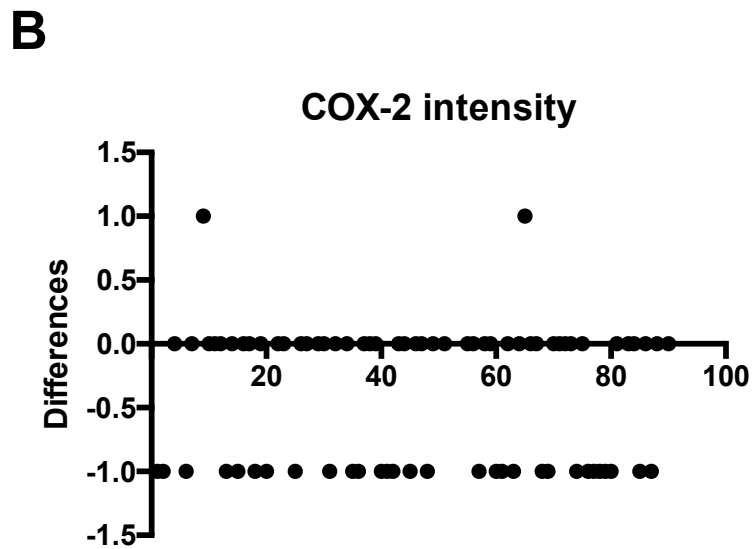

Supplemental Figure S3 - Wilcoxon matched-pairs signed rank test between cancer and adjacent normal tissues. A) SphK1 proportion. B) COX-2 intensity.

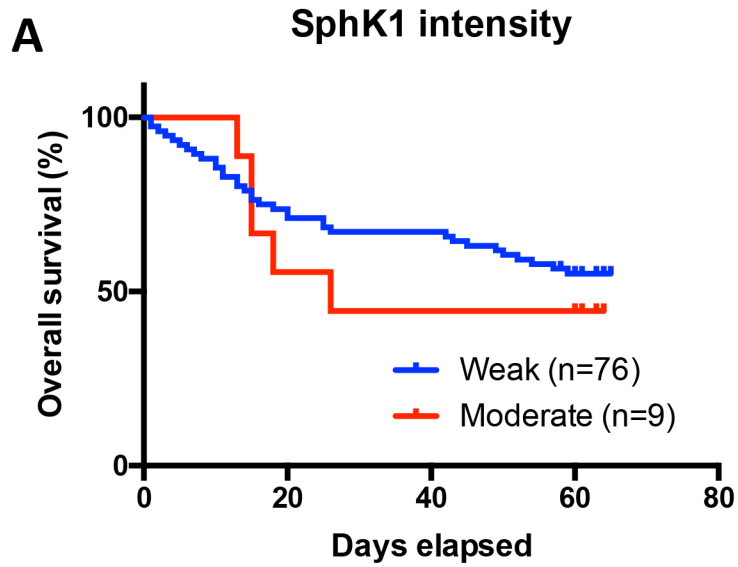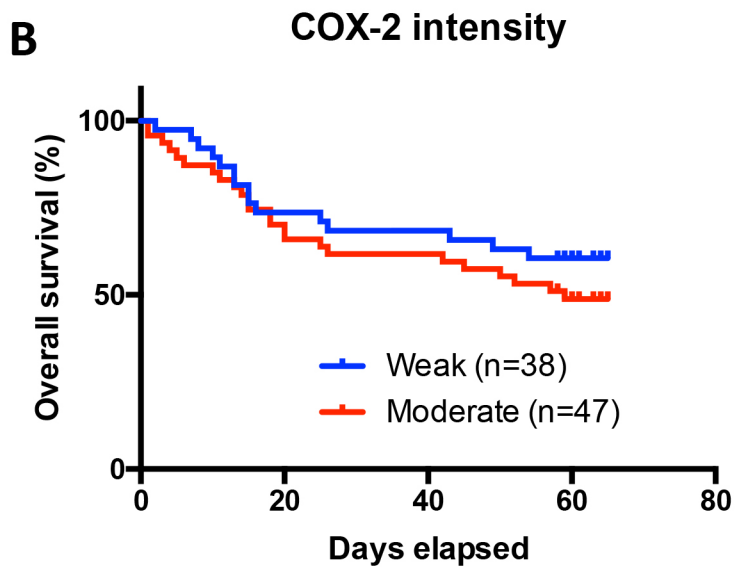

**Supplemental Figure S4 - Effects of SphK1 and COX-2 expression on overall survival.**  
A) SphK1 intensity. B) COX-2 intensity.
